# Supplementary material for: A theoretical study of potentially observable chirality-sensitive NMR effects in molecules
Source: Royal Society of Chemistry journal article supplement (doi:10.1039/c5cp02870a), 2015-01-01
Supplement: c5cp02870a1.pdf [file c5cp02870a1.pdf]

Table 1: Optimized geometries of selected molecules

| molecule                             | nucleus | $X$ / bohr  | $Y$ / bohr  | $Z$ / bohr  |
|--------------------------------------|---------|-------------|-------------|-------------|
| <i>(R)</i> -1,3-difluoroallene       | F       | 4.13803287  | -0.74903179 | 0.33807399  |
|                                      | F       | -4.13799648 | -0.74909816 | -0.33801341 |
|                                      | C       | -0.00001231 | 0.61956651  | -0.00000894 |
|                                      | C       | 2.35439015  | 0.71378522  | -0.70236639 |
|                                      | C       | -2.35442287 | 0.71388805  | 0.70230755  |
|                                      | H       | -3.08833039 | 1.93265986  | 2.16293668  |
|                                      | H       | 3.08818066  | 1.93229645  | -2.16327169 |
| <i>(R)</i> -1,3-difluorocyclopropene | C       | 1.36145473  | 0.25948420  | -0.93993398 |
|                                      | C       | -1.22283553 | 0.28637833  | -0.09025310 |
|                                      | C       | -0.02712389 | 2.36771718  | 0.35656632  |
|                                      | H       | 1.97231991  | 0.33956428  | -2.89020478 |
|                                      | F       | 3.13481910  | -1.07489898 | 0.42936236  |
|                                      | H       | 0.11697583  | 4.25447692  | 1.07981123  |
|                                      | F       | -3.31607582 | -1.00911543 | 0.09215563  |
| <i>(R)</i> -FOOH                     | F       | -2.05962141 | -0.45136819 | 0.00685795  |
|                                      | O       | 0.14463284  | 1.11722666  | -0.03047940 |
|                                      | O       | 2.14971107  | -0.51799867 | 0.12429629  |
|                                      | H       | 2.41280280  | -1.00148896 | -1.61822070 |
| FCHO                                 | F       | 2.00276294  | -0.29572027 | 0.00000000  |
|                                      | O       | -2.16266384 | -0.40784471 | 0.00000000  |
|                                      | C       | -0.28091357 | 0.77460428  | 0.00000000  |
|                                      | H       | -0.08603829 | 2.82430253  | 0.00000000  |
| cyclopropene                         | C       | 0.00000000  | 0.00000000  | -1.66505007 |
|                                      | C       | 1.21978793  | 0.00000000  | 0.90471810  |
|                                      | C       | -1.21978793 | 0.00000000  | 0.90471810  |
|                                      | H       | 0.00000000  | 1.72144844  | -2.77938748 |
|                                      | H       | 0.00000000  | -1.72144844 | -2.77938748 |
|                                      | H       | 2.97418735  | 0.00000000  | 1.91979697  |
|                                      | H       | -2.97418735 | 0.00000000  | 1.91979697  |
| fluoroethene                         | F       | 2.00670618  | 0.33194867  | 0.00000000  |
|                                      | C       | -2.38726733 | 0.41120496  | 0.00000000  |
|                                      | C       | -0.23522599 | -0.84813397 | 0.00000000  |
|                                      | H       | -0.03685838 | -2.87740062 | 0.00000000  |
|                                      | H       | -2.42692867 | 2.44880241  | 0.00000000  |
|                                      | H       | -4.13884042 | -0.62649231 | 0.00000000  |
